# Supplementary material
Source: PubMed Central journal article supplement (PMC4009706)
Supplement: NIHMS549254-supplement-A.pdf [file NIHMS549254-supplement-A.pdf]

## **APPENDIX**

Several types of measurements and assays for different radionuclides were performed in 1954 though some of the radiometric analyses were rudimentary by today's standards and in some cases had chemical interferences or the measurement techniques were non-specific or had insufficient detection sensitivity (see Tables A1–A6).
