# Supplementary material
Source: PubMed Central journal article supplement (PMC4009706)
Supplement: NIHMS549254-supplement-TA1.pdf [file NIHMS549254-supplement-TA1.pdf]

**Table A1.** Summary of analytical methods used for radionuclide assays of urine from Marshallese (adapted from <sup>\*\*\*\*</sup>).

| Source of data                        | Radionuclide                  | Year of collection                                                       | Chemical separation method (where applicable)                                                                                                                   | Counting method                                                                                                                                                                 | Comments on measurement methods                                                                                                     | Data quality                                                                   |
|---------------------------------------|-------------------------------|--------------------------------------------------------------------------|-----------------------------------------------------------------------------------------------------------------------------------------------------------------|---------------------------------------------------------------------------------------------------------------------------------------------------------------------------------|-------------------------------------------------------------------------------------------------------------------------------------|--------------------------------------------------------------------------------|
| LASL<br>(**††,***)                    | <sup>131</sup> I              | 1954                                                                     | None                                                                                                                                                            | Gamma counting with SAC counter (see text).                                                                                                                                     |                                                                                                                                     | Satisfactory, with low to moderate uncertainty                                 |
| LASL<br>(**††,***)                    | <sup>131</sup> I              | 1954                                                                     | Urine aliquots evaporated to dryness after adjusting pH to 8–9                                                                                                  | Total beta activity counting and decay rate measurements (8-d half-life) to confirm <sup>131</sup> I. Counting instruments not specified.                                       | Correction for self absorption/or use of calibration standard were not mentioned. Other beta emitters will interfere.               | Satisfactory, with moderate uncertainty                                        |
|                                       |                               |                                                                          | Extraction/isolation method (not specified). Method used for limited data sets on 100 mL urine aliquots                                                         | Total beta activity counting and decay rate measurement to confirm <sup>131</sup> I.                                                                                            | Yield for extraction was thought to be about 60% of all isotopes, <sup>131</sup> I had the most significant activity in urine.      | Only satisfactory within an order of magnitude due to uncertain chemical yield |
|                                       | <sup>89</sup> Sr              | Dry or wet ashed urine of 100 mL urine aliquots (no chemical separation) | Total nonvolatile beta activity and decay rate measurements (55 d) to confirm <sup>89</sup> Sr. It was predominant isotope after the decay of <sup>131</sup> I. | <sup>90</sup> Sr/ <sup>89</sup> Sr ratio of 0.1 is assumed. Other beta emitters ( <sup>137</sup> Cs) will interfere.                                                            | Satisfactory, with moderate uncertainty                                                                                             |                                                                                |
|                                       |                               | Extraction/isolation method (not specified)                              | Total beta activity and decay rate measurement to confirm <sup>89</sup> Sr.                                                                                     | Chemical yield uncertain due to high variability.                                                                                                                               | High degree of uncertainty                                                                                                          |                                                                                |
|                                       | <sup>45</sup> Ca              | Extraction/isolation method (not specified)                              | Total beta activity counting, instruments not specified.                                                                                                        | Data corrected for self absorption and decay. Other beta emitter can interfere.                                                                                                 | High degree of uncertainty                                                                                                          |                                                                                |
|                                       | Ru (likely <sup>103</sup> Ru) | Extraction/isolation method (not specified)                              | Total beta activity counting, instruments not specified.                                                                                                        | Uncorrected for self absorption. Levels of <sup>103</sup> Ru in urine are expected to be low due to poor absorption in humans (likely introducing large error in measurements). | Unreliable                                                                                                                          |                                                                                |
|                                       | Plutonium                     | 1954                                                                     | Alpha counting                                                                                                                                                  | None known.                                                                                                                                                                     | Lack of required sensitivity and non-specific to plutonium.                                                                         | Unreliable                                                                     |
| Walter Reed<br>(Woodward et al. 1959) | <sup>137</sup> Cs             | 1954–1957                                                                | Precipitation on nickel ferrocyanide from urine made strongly alkaline                                                                                          | Na I well counter with 20 channel gamma spectrometer to count precipitate.                                                                                                      | Spectral analysis calibrated with standard source<br>Reported measurement error of ± 5%                                             | Satisfactory, reliable set of data                                             |
|                                       |                               | 1958                                                                     | No chemical separation                                                                                                                                          | Urine counted directly on 8×4 cm Na I crystal.                                                                                                                                  | Large sample volume (2.5 L)<br>Gamma-ray spectral analysis                                                                          | Satisfactory, reliable set of data                                             |
|                                       | <sup>90</sup> Sr              | 1954–1958                                                                | Precipitation as carbonate, <sup>90</sup> Y was separated and identified by its half-life                                                                       | Precipitation counted using thin-window gas flow counter.                                                                                                                       | Specific separation for <sup>90</sup> Sr<br>Data corrected for decay to time of collection<br>Low to moderate degree of uncertainty | Satisfactory, reliable set of data                                             |

(Continued)

**Table A1.** (Continued)

| Source of data                                                    | Radionuclide     | Year of collection | Chemical separation method (where applicable)                                                                                                                                       | Counting method                                                                                                                                                   | Comments on measurement methods                                                                                                              | Data quality                                                                                                   |
|-------------------------------------------------------------------|------------------|--------------------|-------------------------------------------------------------------------------------------------------------------------------------------------------------------------------------|-------------------------------------------------------------------------------------------------------------------------------------------------------------------|----------------------------------------------------------------------------------------------------------------------------------------------|----------------------------------------------------------------------------------------------------------------|
| U.S. Naval Radiological Defense Laboratory (Cronkite et al. 1956) | <sup>89</sup> Sr |                    | Oxalate precipitation using a small urine aliquot<br>Alternative method:<br>Carbonate precipitation of the entire 24-h urine sample, if collected later than 2.5 mo past detonation | Precipitate counted using thin-window G-M counter<br>Standard source was used for calibration of counter<br>Self-absorption correction was made using Sr standard | The method eliminates the normal <sup>40</sup> K<br>The precipitation method is non-specific and <sup>90</sup> Sr could interfere if present | Satisfactory if <sup>89</sup> Sr activity is much greater than <sup>90</sup> Sr (likely to have been the case) |
|                                                                   | <sup>40</sup> Ba |                    | Mentioned, but no information was provided                                                                                                                                          | —                                                                                                                                                                 | —                                                                                                                                            | Not evaluated                                                                                                  |
|                                                                   | Gross beta       |                    | Mentioned, but no information provided                                                                                                                                              | —                                                                                                                                                                 | —                                                                                                                                            | Not evaluated                                                                                                  |
