# Supplementary material
Source: PubMed Central journal article supplement (PMC4009706)
Supplement: NIHMS549254-supplement-TA2.pdf [file NIHMS549254-supplement-TA2.pdf]

**Table A2.** Summary of USNRDL and HASL urine analysis (volumes in mL and gross beta activity in  $d\ m^{-1}$ ) at four times post-detonation (Cronkite et al. 1956).

| Population and age group                    | Approximate time post-detonation and bioassay data |                         |                     |                    |                         |                     |                    |                         |                     |                    |                         |                     |
|---------------------------------------------|----------------------------------------------------|-------------------------|---------------------|--------------------|-------------------------|---------------------|--------------------|-------------------------|---------------------|--------------------|-------------------------|---------------------|
|                                             | 1 1/2 mo                                           |                         |                     | 2 1/2 mo           |                         |                     | 3 mo               |                         |                     | 6 mo               |                         |                     |
|                                             | Number of subjects                                 | Avg. vol. (mL) per 24 h | Avg. dis $min^{-1}$ | Number of subjects | Avg. vol. (mL) per 24 h | Avg. dis $min^{-1}$ | Number of subjects | Avg. vol. (mL) per 24 h | Avg. dis $min^{-1}$ | Number of subjects | Avg. vol. (mL) per 24 h | Avg. dis $min^{-1}$ |
| Rongelap                                    |                                                    |                         |                     |                    |                         |                     |                    |                         |                     |                    |                         |                     |
| <5 y                                        | 7                                                  | 165                     | 404                 | —                  | —                       | —                   | —                  | —                       | —                   | 8                  | 360                     | 12                  |
| 5–16 y                                      | 11                                                 | 439                     | 758                 | —                  | —                       | —                   | —                  | —                       | —                   | 12                 | 510                     | 5                   |
| >16 y                                       | 13                                                 | 581                     | 1,208               | 10                 | 824                     | 705                 | 10                 | 379                     | 339                 | 33                 | 625                     | 0                   |
| Ailinginae                                  |                                                    |                         |                     |                    |                         |                     |                    |                         |                     |                    |                         |                     |
| <5 y                                        | 1                                                  | 150                     | 217                 | —                  | —                       | —                   | —                  | —                       | —                   | —                  | —                       | —                   |
| 5–16 y                                      | 2                                                  | 275                     | 126                 | —                  | —                       | —                   | —                  | —                       | —                   | 3                  | 400                     | 0                   |
| >16 y                                       | 10                                                 | 722                     | 553                 | —                  | —                       | —                   | —                  | —                       | —                   | 12                 | 655                     | 0                   |
| American military weather observers (adult) | 25                                                 | 1,158                   | 309                 | —                  | —                       | —                   | —                  | —                       | —                   | —                  | —                       | —                   |
