# Supplementary material
Source: PubMed Central journal article supplement (PMC4009706)
Supplement: NIHMS549254-supplement-TA3.pdf [file NIHMS549254-supplement-TA3.pdf]

**Table A3.** Gross beta activity in urine of individuals from Rongelap, sampled at 46 d post-detonation in USNRDL analyses (Cronkite et al. 1956).

| Age and case no.    | Urine vol.<br>(mL per 24 h) | Beta activity<br>(dis min <sup>-1</sup> ) |
|---------------------|-----------------------------|-------------------------------------------|
| <u>Age &lt;5 y</u>  |                             |                                           |
| 2                   | 120                         | 712                                       |
| 3                   | 150                         | 894                                       |
| 5                   | 155                         | 313                                       |
| 23                  | 40                          | 223                                       |
| 33                  | 260                         | 0                                         |
| 54                  | 80                          | 385                                       |
| 69                  | 455                         | 301                                       |
| <b>Mean =</b>       | <b>165</b>                  | <b>404</b>                                |
| <u>Age 6–15 y</u>   |                             |                                           |
| 20                  | 265                         | 1,900                                     |
| 24                  | 550                         | 0                                         |
| 26                  | 650                         | 1,032                                     |
| 35                  | 255                         | 0                                         |
| 36                  | 190                         | 236                                       |
| 39                  | 280                         | 1,100                                     |
| 47                  | 650                         | 1,705                                     |
| 67                  | 450                         | 674                                       |
| 72                  | 110                         | 507                                       |
| 75                  | 440                         | 0                                         |
| 76                  | 980                         | 1,180                                     |
| <b>Mean =</b>       | <b>439</b>                  | <b>758</b>                                |
| <u>Age &gt;16 y</u> |                             |                                           |
| 4                   | 455                         | 634                                       |
| 7                   | 810                         | 1,700                                     |
| 9                   | 355                         | 201                                       |
| 10                  | 980                         | 549                                       |
| 11                  | 450                         | 1,583                                     |
| 13                  | 340                         | 1,677                                     |
| 14                  | 780                         | 2,460                                     |
| 18                  | 455                         | 1,670                                     |
| 22                  | 47                          | 77                                        |
| 20                  | 960                         | 438                                       |
| 34                  | 750                         | 570                                       |
| 37                  | 480                         | 792                                       |
| 40                  | 550                         | 1,450                                     |
| 46                  | 330                         | 495                                       |
| 49                  | 425                         | 0                                         |
| 52                  | 780                         | 0                                         |
| 55                  | 320                         | 1,080                                     |
| 56                  | 700                         | 3,220                                     |
| 57                  | 550                         | 1,095                                     |
| 58                  | 750                         | 2,170                                     |
| 60                  | 810                         | 580                                       |
| 62                  | 980                         | 1,985                                     |
| 63                  | 635                         | 2,260                                     |
| 66                  | 855                         | 1,715                                     |
| 68                  | 300                         | 2,010                                     |
| 71                  | 290                         | 1,450                                     |
| 73                  | 230                         | 0                                         |
| 78                  | 965                         | 52                                        |
| 79                  | 465                         | 2,038                                     |
| 80                  | 540                         | 1,353                                     |
| 82                  | 670                         | 2,140                                     |
| <b>Mean =</b>       | <b>581</b>                  | <b>1,208</b>                              |
