# Supplementary material
Source: PubMed Central journal article supplement (PMC4009706)
Supplement: NIHMS549254-supplement-TA4.pdf [file NIHMS549254-supplement-TA4.pdf]

**Table A4.** Gross beta activity in urine of individuals from Rongelap people on Ailinginae and American military on Rongerik sampled at 46 and 44 d post-detonation, respectively, in USNRDL analyses (Cronkite et al. 1956).

| Ailinginae (H+46 d)                                      |                          |                                        |
|----------------------------------------------------------|--------------------------|----------------------------------------|
| Age group and case no.                                   | Urine vol. (mL per 24 h) | Beta activity (dis min <sup>-1</sup> ) |
| <u>Age &lt;5 y</u>                                       |                          |                                        |
| 6                                                        | —                        | —                                      |
| 8                                                        | —                        | —                                      |
| 44                                                       | 150                      | 217                                    |
| <b>Mean =</b>                                            | <b>150</b>               | <b>217</b>                             |
| <u>Age 6–15 y</u>                                        |                          |                                        |
| 48                                                       | 180                      | 164                                    |
| 53                                                       | —                        | —                                      |
| 81                                                       | 370                      | 88                                     |
| <b>Mean =</b>                                            | <b>275</b>               | <b>126</b>                             |
| <u>Age &gt;16 y</u>                                      |                          |                                        |
| 1                                                        | 900                      | 765                                    |
| 16                                                       | 880                      | 827                                    |
| 28                                                       | 680                      | 1202                                   |
| 29                                                       | 780                      | 0                                      |
| 31                                                       | 260                      | 846                                    |
| 41                                                       | 920                      | 62                                     |
| 43                                                       | 610                      | 754                                    |
| 45                                                       | 850                      | 680                                    |
| 51                                                       | 410                      | 400                                    |
| 70                                                       | 440                      | 0                                      |
| <b>Mean =</b>                                            | <b>722</b>               | <b>553</b>                             |
| American military weather observers on Rongerik (H+44 d) |                          |                                        |
| Age group and case no.                                   | Urine vol. (mL per 24 h) | Beta activity (dis min <sup>-1</sup> ) |
| <u>Adults</u>                                            |                          |                                        |
| 1                                                        | 1,970                    | 0                                      |
| 2                                                        | 650                      | 0                                      |
| 3                                                        | 1,224                    | 820                                    |
| 4                                                        | 440                      | 78                                     |
| 5                                                        | 735                      | 0                                      |
| 6                                                        | 900                      | 248                                    |
| 7                                                        | 1,340                    | 0                                      |
| 8                                                        | 1,410                    | 1,260                                  |
| 9                                                        | —                        | —                                      |
| 10                                                       | —                        | —                                      |
| 11                                                       | 1,580                    | 385                                    |
| 12                                                       | 1,460                    | 0                                      |
| 13                                                       | 1,810                    | 965                                    |
| 14                                                       | 720                      | 438                                    |
| 15                                                       | 1,380                    | 830                                    |
| 16                                                       | 1,930                    | 0                                      |
| 117                                                      | 945                      | —                                      |
| 18                                                       | 1,520                    | 0                                      |
| 19                                                       | 1,300                    | 466                                    |
| 20                                                       | 1,070                    | 0                                      |
| 21                                                       | 550                      | 353                                    |
| 22                                                       | —                        | —                                      |
| 23                                                       | 1,180                    | 0                                      |
| 24                                                       | 1,160                    | 750                                    |
| 25                                                       | 1,380                    | 187                                    |
| 26                                                       | 510                      | 323                                    |
| 27                                                       | 565                      | —                                      |
| 28                                                       | 1,220                    | 0                                      |
| <b>Mean =</b>                                            | <b>1,158</b>             | <b>309</b>                             |
