# Supplementary material
Source: PubMed Central journal article supplement (PMC4009706)
Supplement: NIHMS549254-supplement-TA5.pdf [file NIHMS549254-supplement-TA5.pdf]

**Table A5.** Radionuclide analysis of urine from Rongelap people 45 d post-detonation (H+45) in NRDL analyses (Cronkite et al. 1956).

| Sample no.                        | Beta activity (dis min <sup>-1</sup> ) |                  |                   |                     |
|-----------------------------------|----------------------------------------|------------------|-------------------|---------------------|
|                                   | Gross beta                             | <sup>89</sup> Sr | <sup>140</sup> Ba | Rare earth activity |
| 1                                 | 1,370                                  | 490              | 120               | 197                 |
| 2                                 | 1,260                                  | 510              | 130               | 244                 |
| 3                                 | 1,020                                  | 480              | 120               | 324                 |
| 4                                 | 1,210                                  | 626              | 150               | 284                 |
| 5                                 | 1,460                                  | 328              | 110               | 474                 |
| 6                                 | 1,200                                  | 727              | 170               | 353                 |
| <b>Mean =</b>                     | 1,253                                  | 562              | 134               | 312                 |
| Percent of total<br>beta activity | 100                                    | 42               | 10.7              | 25.5                |
