# Supplementary material
Source: PubMed Central journal article supplement (PMC4009706)
Supplement: NIHMS549254-supplement-TA6.pdf [file NIHMS549254-supplement-TA6.pdf]

**Table A6.** Urine bioassay counting ( $\text{d m}^{-1} \text{L}^{-1}$ ) data for plutonium from Rongelap adults.\*\*\*\*\*

| Collection dates, disintegration rates, and urine volumes <sup>a</sup> |                                          |            |                   |                                          |            |                   |
|------------------------------------------------------------------------|------------------------------------------|------------|-------------------|------------------------------------------|------------|-------------------|
| Subject No.                                                            | 3/24/1954                                |            |                   | 3/25/1954                                |            |                   |
|                                                                        | dis $\text{min}^{-1}$<br>$\text{L}^{-1}$ | $1 \sigma$ | Urine volume (mL) | dis $\text{min}^{-1}$<br>$\text{L}^{-1}$ | $1 \sigma$ | Urine volume (mL) |
| 1                                                                      | 1                                        | 2          | 965               | 0                                        | 2.5        | 670               |
| 4                                                                      | 0                                        | 2.5        | —                 | —                                        | na         | —                 |
| 7                                                                      | 0                                        | 2.5        | —                 | 0                                        | 2.5        | —                 |
| 9                                                                      | 1                                        | 2          | —                 | 0                                        | 2.5        | —                 |
| 10                                                                     | 0                                        | 2.5        | —                 | 1                                        | 2          | —                 |
| 11                                                                     | 0                                        | 2.5        | —                 | 0                                        | 2.5        | —                 |
| 12                                                                     | 0                                        | 2.5        | —                 | 1                                        | 2          | —                 |
| 14                                                                     | 4                                        | 2.5        | —                 | 0                                        | 2.5        | —                 |
| 16                                                                     | 0                                        | 2.5        | 955               | 0                                        | 2.5        | 800               |
| 18                                                                     | —                                        | na         | —                 | 5                                        | 4.5        | —                 |
| 19                                                                     | 0                                        | 2.5        | —                 | —                                        | na         | —                 |
| 22                                                                     | 7                                        | 2.5        | —                 | 0                                        | 2.5        | —                 |
| 25                                                                     | 0                                        | 2.5        | —                 | —                                        | na         | —                 |
| 26                                                                     | 1                                        | 2          | —                 | 0                                        | 2.5        | —                 |
| 28                                                                     | 0                                        | 2.5        | 810               | 0                                        | 2.5        | 785               |
| 29                                                                     | 1                                        | 2          | 565               | 0                                        | 2.5        | 845               |
| 30                                                                     | —                                        | na         | —                 | 0                                        | 2.5        | —                 |
| 32                                                                     | —                                        | na         | —                 | 3                                        | 2.5        | —                 |
| 33                                                                     | —                                        | na         | 70                | 2                                        | 4          | 210               |
| 34                                                                     | 0                                        | 2.5        | 685               | 0                                        | 2.5        | 895               |
| 35                                                                     | 0                                        | 2.5        | 250               | —                                        | na         | 155               |
| 37                                                                     | 0                                        | 2.5        | 550               | 0                                        | 2.5        | 385               |
| 39                                                                     | —                                        | na         | 175               | —                                        | —          | —                 |
| 40                                                                     | 0                                        | 2.5        | 700               | 0                                        | 2.5        | 650               |
| 41                                                                     | 1                                        | 2          | 950               | 12                                       | 3          | 985               |
| 43                                                                     | 0                                        | 2.5        | 720               | 0                                        | 2.5        | 775               |
| 44                                                                     | —                                        | na         | —                 | —                                        | na         | 90                |
| 45                                                                     | 0                                        | 2.5        | 680               | 0                                        | 2.5        | 935               |
| 46                                                                     | —                                        | na         | —                 | 0                                        | 2.5        | 205               |
| 47                                                                     | 0                                        | 2.5        | 975               | 0                                        | 2.5        | 540               |
| 49                                                                     | 17                                       | 3          | 980               | —                                        | na         | 130               |
| 50                                                                     | 1                                        | 2          | 765               | 100                                      | 8          | 770               |
| 51                                                                     | 8                                        | 2.5        | 320               | 0                                        | 2.5        | 230               |
| 52                                                                     | —                                        | na         | —                 | 0                                        | 2.5        | 285               |
| 53                                                                     | 3.5                                      | 2.5        | 530               | —                                        | na         | 105               |
| 55                                                                     | 0                                        | 2.5        | 400               | 0                                        | 2.5        | 720               |
| 56                                                                     | —                                        | na         | —                 | 0                                        | 2.5        | 595               |
| 57                                                                     | —                                        | na         | 360               | 0                                        | 2.5        | 830               |
| 58                                                                     | 3                                        | 2.5        | 665               | 0                                        | 2.5        | 640               |
| 59                                                                     | 0                                        | 2.5        | 800               | 0                                        | 2.5        | 430               |
| 60                                                                     | 4.5                                      | 2.5        | 900               | —                                        | na         | 150               |
| 61                                                                     | 0                                        | 2.5        | 250               | 0                                        | 2.5        | 480               |
| 62                                                                     | 0                                        | 2.5        | 560               | 0                                        | 2.5        | 755               |
| 63                                                                     | 0                                        | 2.5        | 840               | 2.5                                      | 2          | 420               |
| 64                                                                     | 2                                        | 2          | 685               | 1                                        | 2          | 550               |
| 66                                                                     | 0                                        | 2.5        | 785               | 7                                        | 2.5        | 950               |
| 67                                                                     | 0                                        | 2.5        | 500               | —                                        | na         | —                 |
| 68                                                                     | 3                                        | 2.5        | 940               | 1                                        | 2          | 590               |
| 69                                                                     | 1.5                                      | 2.5        | 160               | —                                        | na         | —                 |
| 70                                                                     | —                                        | na         | —                 | 7.5                                      | 2.5        | 750               |
| 71                                                                     | 0                                        | 2.5        | 225               | 0                                        | 2.5        | 210               |
| 72                                                                     | —                                        | na         | —                 | 0                                        | 2.5        | 265               |
| 73                                                                     | 1                                        | 2          | 450               | —                                        | —          | —                 |
| 74                                                                     | —                                        | na         | 380               | 0                                        | 2.5        | 630               |
| 75                                                                     | 0                                        | 2.5        | 300               | —                                        | na         | —                 |
| 76                                                                     | 0                                        | 2.5        | 980               | 0                                        | 2.5        | 470               |
| 77                                                                     | —                                        | na         | —                 | 2.5                                      | 2          | 965               |
| 78                                                                     | 0                                        | 2.5        | 640               | 0                                        | 2.5        | 340               |
| 79                                                                     | 0                                        | 2.5        | 915               | 0                                        | 2.5        | 480               |
| 80                                                                     | 2.5                                      | 2          | 690               | 0                                        | 2.5        | 560               |
| 81                                                                     | 6                                        | 2.5        | 815               | 0                                        | 2.5        | 450               |
| 82                                                                     | —                                        | na         | —                 | 1                                        | 2          | 205               |

<sup>a</sup> Dash (—) indicates no data; “na” means not applicable.
